# Supplementary material for: Synthesis and structural characterization of bio-based bis(cyclic carbonate)s for the preparation of non-isocyanate polyurethanes
Source: Royal Society of Chemistry journal article supplement (doi:10.1039/d0py01576h), 2021-01-01
Supplement: d0py01576h1.pdf [file d0py01576h1.pdf]

## Supplementary information

**Table S1:** Overview of all product and semi-products mentioned in the manuscript

| Number | Chemical structure |
|--------|--------------------|
| 1      |                    |
| 2      |                    |
| 3      |                    |
| 4      |                    |
| 5      |                    |
| 6      |                    |
| 7      |                    |
| 8      |                    |
| 9      |                    |
| 10     |                    |
| 11     |                    |

|    |  |
|----|--|
| 12 |  |
| 13 |  |
| 14 |  |
| 15 |  |
| 16 |  |
| 17 |  |
| 18 |  |
| 19 |  |
| 20 |  |



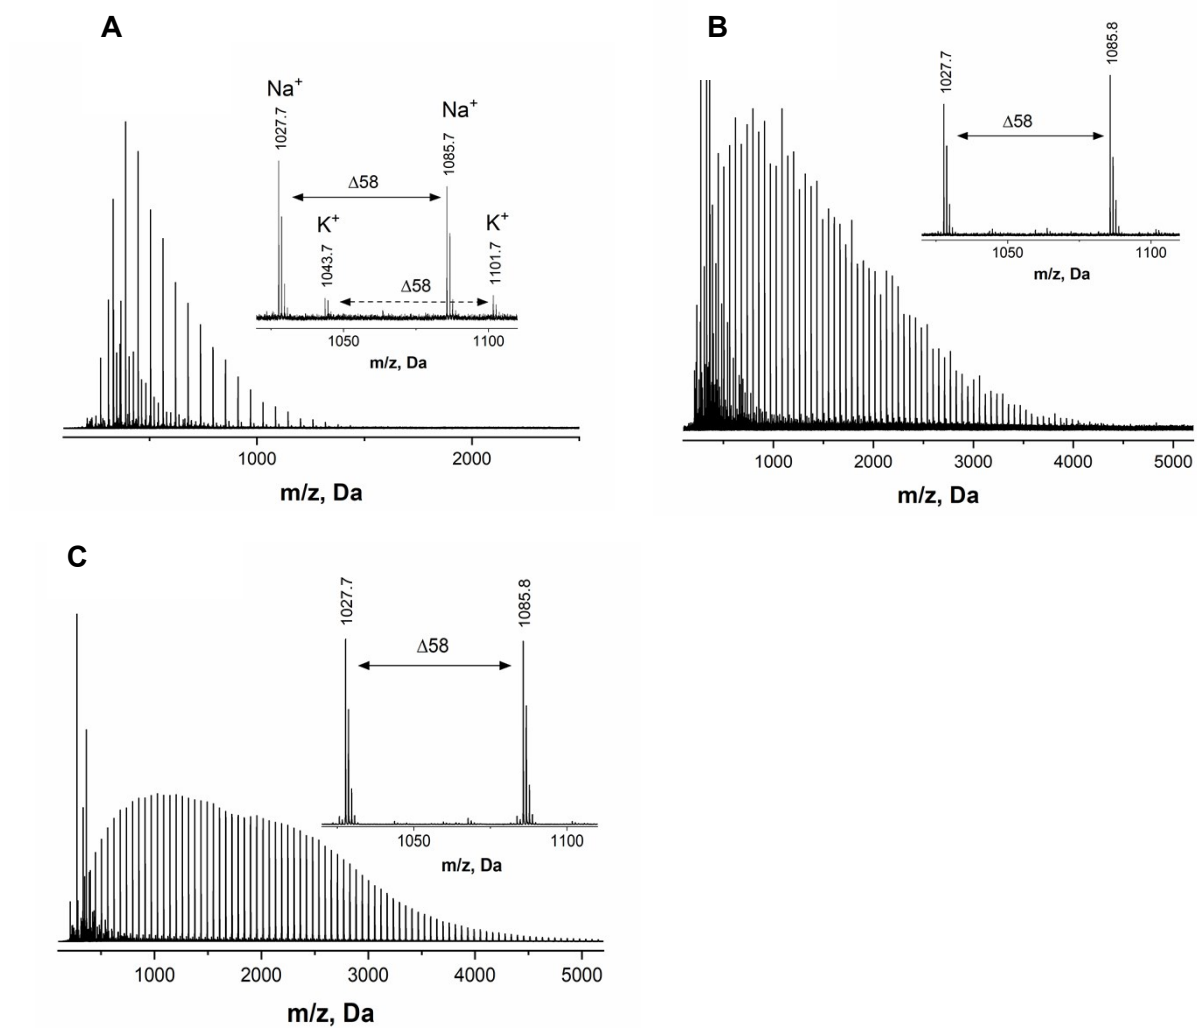

**Figure S1:** MALDI TOF mass spectra of the initial bio-based poly(trimethylene glycol) PO3G250 (A), PO3G650 (B) and PO3G1000 (C), and assigned structure (D). The peaks correspond to sodium adducts of molecular ions  $[M+Na]^+$  (unless otherwise marked).

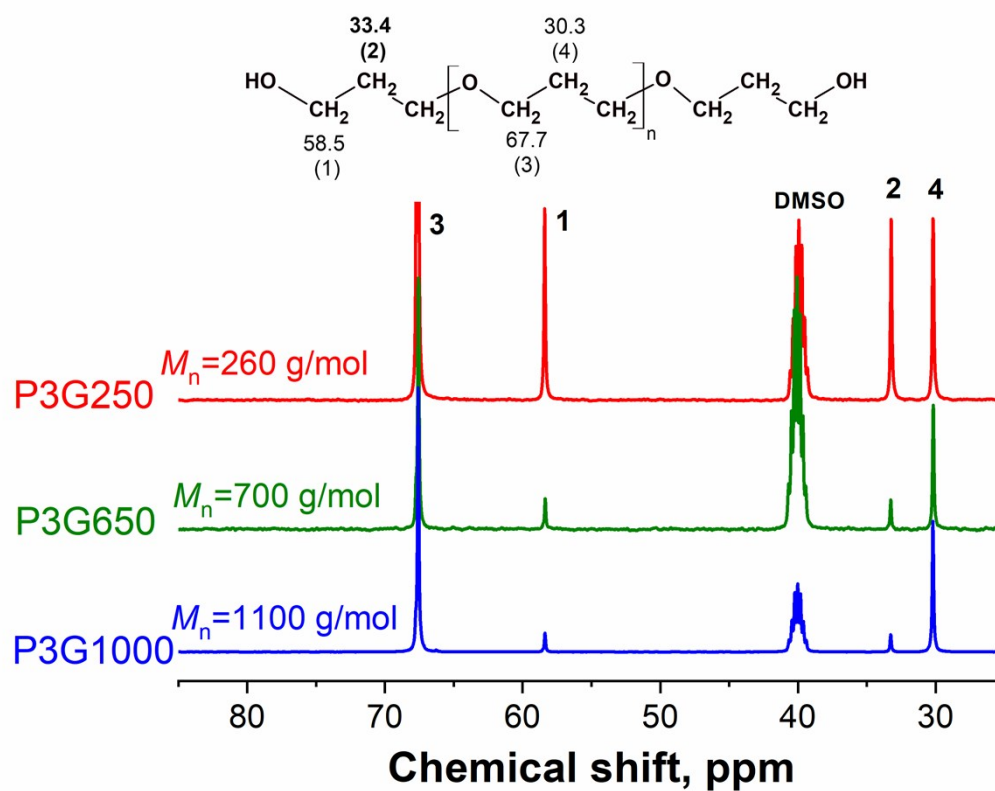

**Figure S2:**  $^{13}\text{C}$  NMR spectra of the original PO3G polyols (PO3G250, PO3G650 and PO3G1000). The number-average molecular weights ( $M_n$ ) of the PO3G polyols were calculated using integral values of end-groups (signal 2 at 33.4 ppm) and repeating units (signal 4 at 30.3 ppm).

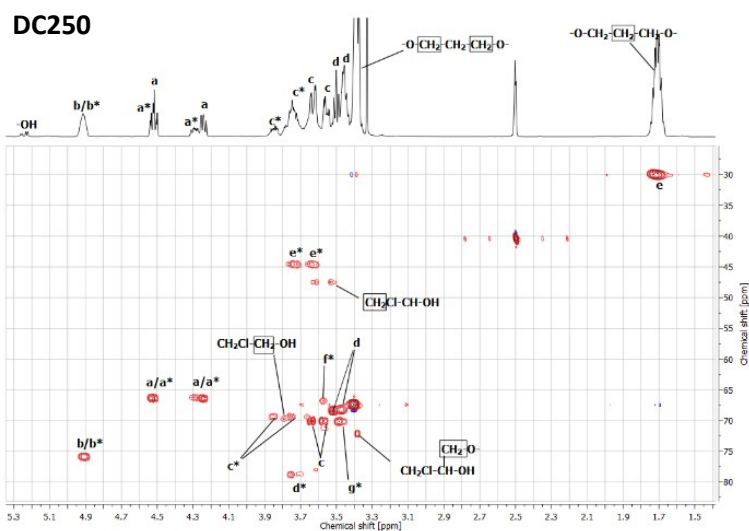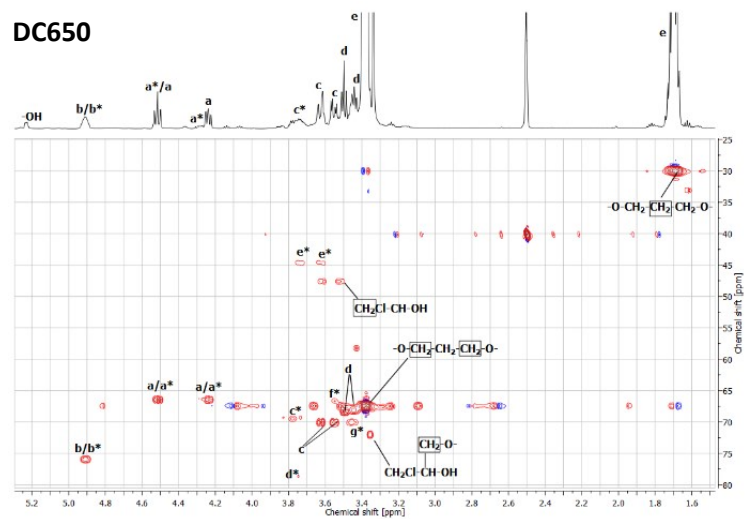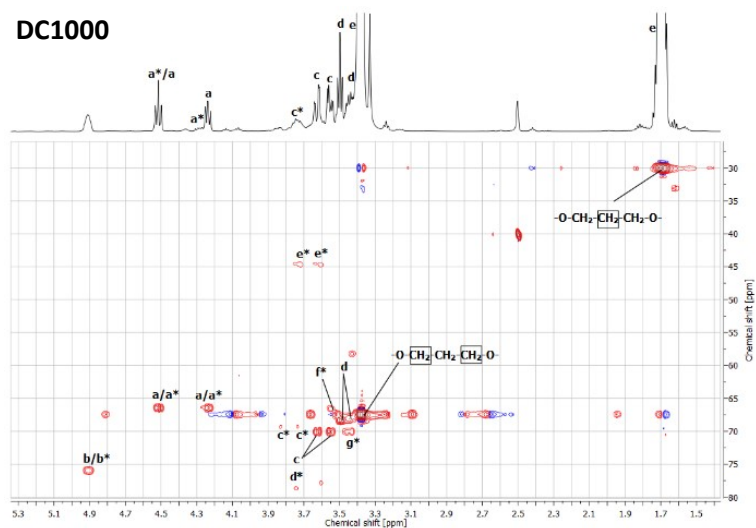

**Figure S3:**  $^1\text{H}$ - $^{13}\text{C}$  HSQC spectra of the synthesized bis(cyclic carbonate)s showing proton signals of cyclic carbonate ring in the  $\alpha$ -C (a) and  $\beta$ -C (b) positions at 4.25 ppm (a), 4.50 ppm (a), 4.90 ppm (b), respectively.

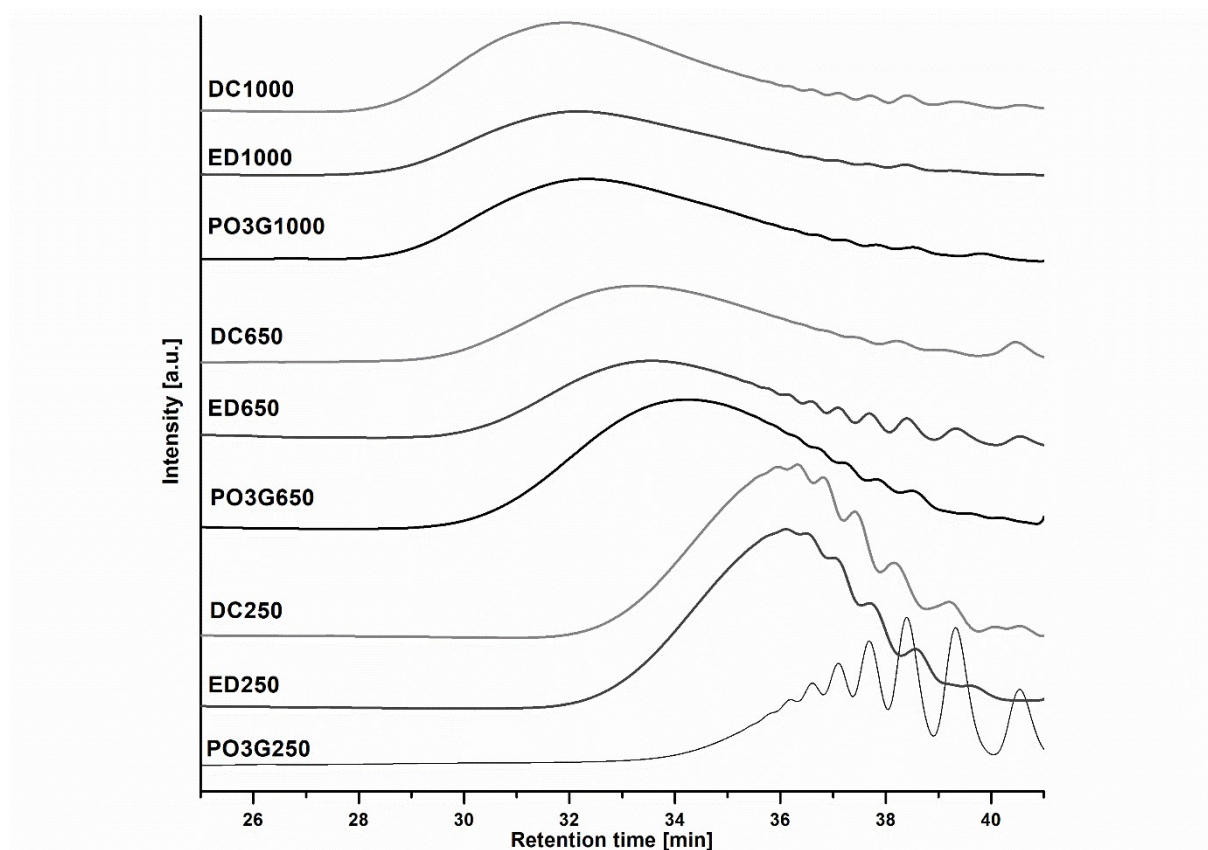

**Figure S4:** SEC records of the initial bio-based poly(trimethylene glycol)s (PO3G250, PO3G650 and PO3G1000), the synthesized diglycidyl ethers (ED250, ED650 and ED1000) and the synthesized bis(cyclic carbonate)s (DC250, DC650 and DC1000).

**Table S2** SEC results: number average molar mass( $M_n$ ) and dispersity ( $\mathcal{D}$ ) of original polyols (PO3G250, PO3G650 and PO3G1000), epoxidized polyols (ED250, ED650 and ED1000) and bis(cyclic carbonate)s (DC250, DC650 and DC1000). PS calibration was applied.

| Sample          | $M_n$ (SEC)            | $\mathcal{D}$ (SEC) |
|-----------------|------------------------|---------------------|
|                 | [g mol <sup>-1</sup> ] |                     |
| <b>PO3G250</b>  | 260                    | 1.6                 |
| <b>ED250</b>    | 520                    | 1.4                 |
| <b>DC250</b>    | 540                    | 1.4                 |
| <b>PO3G650</b>  | 700                    | 2.5                 |
| <b>ED650</b>    | 790                    | 1.8                 |
| <b>DC650</b>    | 800                    | 2.0                 |
| <b>PO3G1000</b> | 1100                   | 2.2                 |
| <b>ED1000</b>   | 1100                   | 2.5                 |
| <b>DC1000</b>   | 1200                   | 2.2                 |

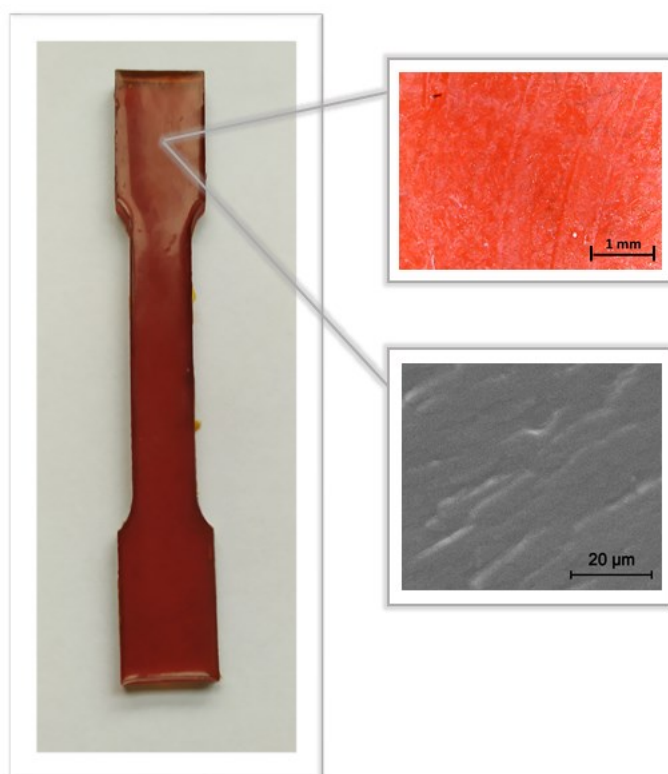

**Figure S5:** Photograph of NIPU650, optical microscope and scanning electron microscope images

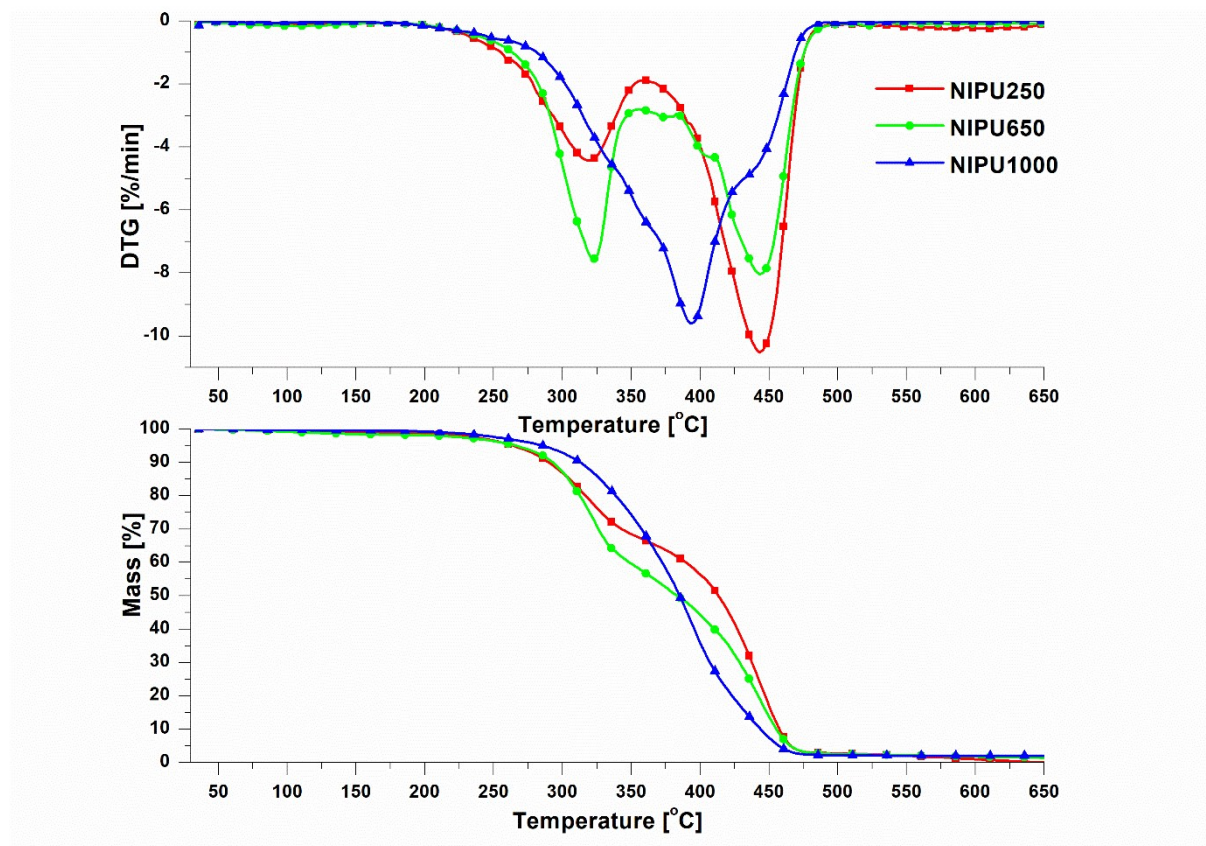

**Figure S6:** TGA and DTG curves of prepared non-isocyanate polyurethanes

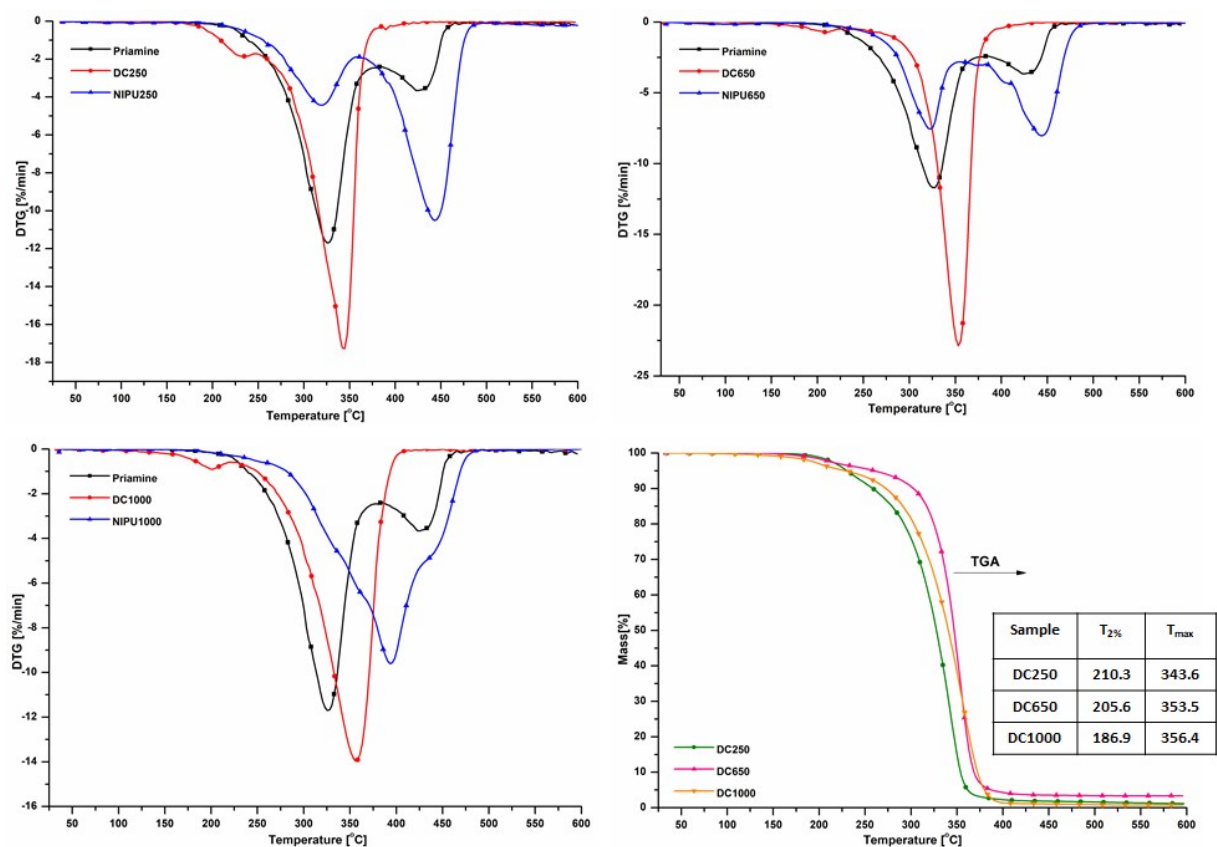

**Figure S7:** Thermal stability of pure bis(cyclic carbonate)s (DC250, DC650, and DC1000) and amine hardener (Priamine 1071) in conjunction with NIPUs synthesized on their basis
